# Supplementary material
Source: MDPI journal article supplement (https://www.mdpi.com/2073-445X/8/9/130)
Supplement: s1 [file s1]

# Using Farmer Decision Rules for Mapping Historical Land Use Change Patterns from 1954 to 2007 in Rural Northwestern Vietnam

Thanh Thi Nguyen<sup>1,2,\*</sup>, Melvin Lippe<sup>3</sup>, Carsten Marohn<sup>1</sup>, Tran Duc Vien<sup>2</sup> and Georg Cadisch<sup>1</sup>

<sup>1</sup> Institute of Agricultural Sciences in the Tropics (Hans-Ruthenberg-Institute), Section Agronomy in the Tropics and Subtropics (490e), University of Hohenheim, 70599 Stuttgart, Germany

<sup>2</sup> Center for Agricultural Research and Environmental Studies (CARES), Vietnam National University of Agriculture, 100000 Hanoi, Vietnam

<sup>3</sup> Thünen Institute of International Forestry and Forest Economics, 21031 Hamburg, Germany

\* Corresponding author: [thanhnguyen.hagel@gmail.com](mailto:thanhnguyen.hagel@gmail.com)

**Figure S1.** Local soil map of the Chieng Khoi commune for reference year 1954, modified from Clemens et al. [36]. The left image presents the black and non-black soil map, the right map represents a detailed soil map with stony properties (sandy, poor, red, and yellow soils) and black soil non-stony.

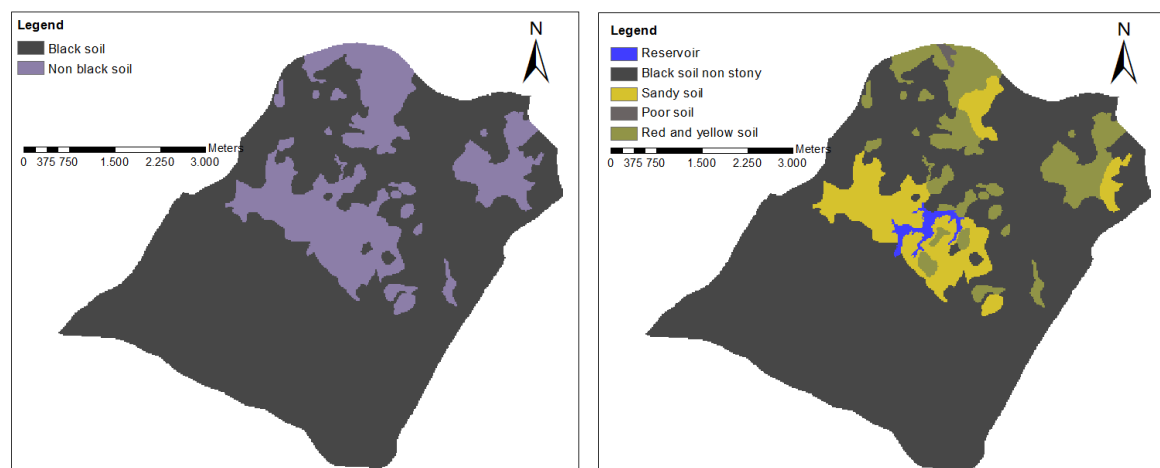

**Figure S2.** Slope map and distance maps of the Chieng Khoi commune.

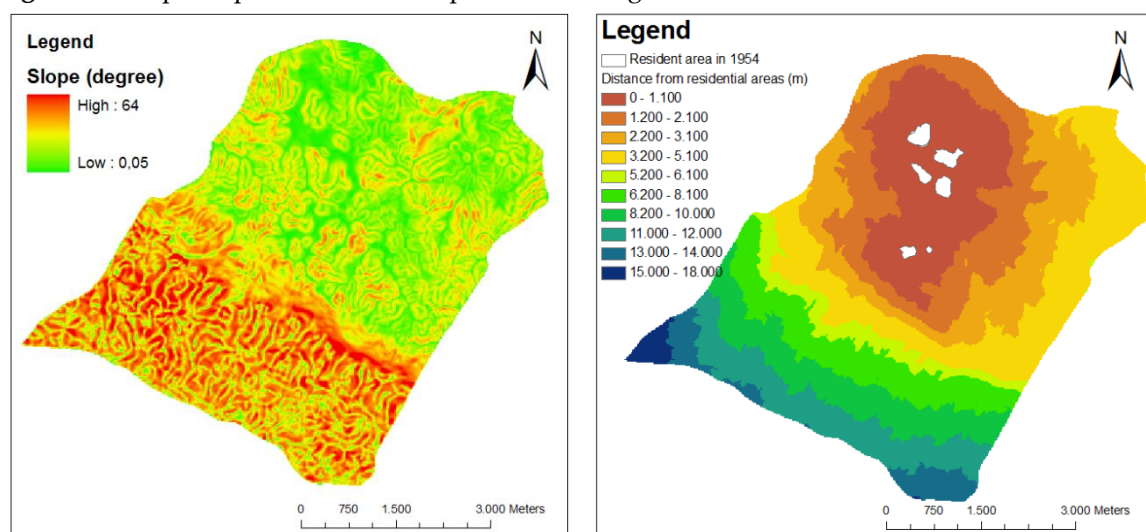

**Table S1.** Crop choice matrixes developed during focus group discussions; abbreviations refer to the choice-crop as a result of the pairwise ranking exercises; crops with a higher score refer higher farmers' choice; crop choice matrixes refer to different years and stages representing participants agreements during focus group discussions.

Ban Ngoang

| <b>1986</b>  | Paddy Rice | Upland Rice | Maize | New Cassava | Old Cassava | Sweet potato | Sesame | <b>Rank</b> |
|--------------|------------|-------------|-------|-------------|-------------|--------------|--------|-------------|
| Paddy rice   | X          | PR          | PR    | PR          | PR          | PR           | PR     | <b>7</b>    |
| Upland rice  |            | X           | UR    | UR          | UR          | UR           | UR     | <b>6</b>    |
| Maize        |            |             | X     | NC          | OC          | SP           | M      | <b>4</b>    |
| New cassava  |            |             |       | X           | OC          | SP           | NC     | <b>1</b>    |
| Old cassava  |            |             |       |             | X           | OC           | OC     | <b>5</b>    |
| Sweet potato |            |             |       |             |             | X            | SP     | <b>3</b>    |
| Sesame       |            |             |       |             |             |              | X      | <b>2</b>    |

| <b>1954</b>     | Paddy Rice | Upland Rice | Old Cassava | Sticky Maize | Sweet potato | C/Silkworm | <b>Rank</b> |
|-----------------|------------|-------------|-------------|--------------|--------------|------------|-------------|
| Upland rice     | X          | UR          | UR          | UR           | -            | UR         | <b>5</b>    |
| Paddy rice      |            | X           | PR          | PR           | -            | PR         | <b>4</b>    |
| Old cassava     |            |             | X           | OC           | -            | OC         | <b>3</b>    |
| Sticky maize    |            |             |             | X            | -            | C/S        | <b>1</b>    |
| Sweet potato    |            |             |             |              | X            | -          | <b>-</b>    |
| Cotton/silkworm |            |             |             |              |              | X          | <b>2</b>    |

Ban Hiem

| <b>2011</b>  | Paddy Rice | Sticky Maize | New Maize | 3yr Cassava | 1yr Cassava | Sesame | Peanut | Soybean | <b>Rank</b> |
|--------------|------------|--------------|-----------|-------------|-------------|--------|--------|---------|-------------|
| Paddy rice   | X          | PR           | PR        | PR          | PR          | PR     | PR     | PR      | <b>8</b>    |
| Sticky maize |            | X            | NM        | 3YC         | 1YC         | SM     | PN     | SM      | <b>3</b>    |
| New maize    |            |              | X         | 3YC         | NM          | NM     | NM     | NM      | <b>7</b>    |
| 3yr cassava  |            |              |           | X           | 1YC         | 3YC    | PN     | 3YC     | <b>5</b>    |
| 1yr cassava  |            |              |           |             | X           | 1YC    | 1YC    | 1YC     | <b>7</b>    |
| Sesame       |            |              |           |             |             | X      | PN     | SS      | <b>2</b>    |
| Peanut       |            |              |           |             |             |        | X      | PN      | <b>5</b>    |
| Soybean      |            |              |           |             |             |        |        | X       | <b>1</b>    |

| <b>2011</b> | Paddy rice | 1yr Cassava | New maize | Banana | 2yr Cassava | Sticky Maize | Mango | Tamarind | <b>Rank</b> |
|-------------|------------|-------------|-----------|--------|-------------|--------------|-------|----------|-------------|
| Paddy rice  | <b>X</b>   | PR          | PR        | PR     | PR          | PR           | PR    | PR       | <b>8</b>    |
| 1yr cassava |            | <b>X</b>    | 1YC       | 1YC    | 1YC         | 1YC          | 1YC   | 1YC      | <b>7</b>    |

|              |          |          |          |          |          |          |          |
|--------------|----------|----------|----------|----------|----------|----------|----------|
| Maize        | <b>X</b> | M        | M        | M        | M        | M        | <b>6</b> |
| Banana       |          | <b>X</b> | 2YC      | BN       | BN       | BN       | <b>4</b> |
| 2yr cassava  |          |          | <b>X</b> | 2YC      | 2YC      | 2YC      | <b>5</b> |
| Sticky maize |          |          |          | <b>X</b> | SM       | SM       | <b>3</b> |
| Mango        |          |          |          |          | <b>X</b> | TM       | <b>1</b> |
| Tamarind     |          |          |          |          |          | <b>X</b> | <b>2</b> |

29

| <b>1999 and 1986</b> | Paddy Rice | Maize | 2 yr Cassava | Banana | Vegetable | Mango | Sticky Maize | <b>Rank</b> |
|----------------------|------------|-------|--------------|--------|-----------|-------|--------------|-------------|
| Paddy rice           | X          | PR    | PR           | PR     | PR        | PR    | PR           | <b>7</b>    |
| Maize                |            | X     | 2YC          | M      | M         | M     | M            | <b>5</b>    |
| 2yr cassava          |            |       | X            | 2YC    | 2YC       | 2YC   | 2YC          | <b>6</b>    |
| Banana               |            |       |              | X      | BN        | BN    | BN           | <b>4</b>    |
| Vegetable            |            |       |              |        | X         | MG    | SM           | <b>1</b>    |
| Mango                |            |       |              |        |           | X     | SM           | <b>2</b>    |
| Sticky maize         |            |       |              |        |           |       | X            | <b>3</b>    |

30 **Table S2.** Comparison of identifying areas after the adjustment process with defined areas, as  
31 cropping areas to produce the required food intake according to farmers; positive values indicating  
32 that estimated cropping areas were higher than the defined target area\*, while negative values  
33 indicate estimated cropping areas lower than the defined targeted values.

34 The calculation of the sixth year fallow area received the largest deviation from the "defined  
35 value", in this case -0.78 ha, the smallest different areas were the calculation for the second year of  
36 fallow, fifth year fallow (+0.02 ha), and second year maize and cassava (-0.02 ha). While increasing  
37 the distance to reach the defined areas, upland rice crop (in first and second year) had the closest  
38 distance to residential areas (1.1 km) while fallow (at all stages) revealed the longest distance to  
39 residential areas (2.14 km). The area resulting from all calculations slightly differed with defined  
40 areas. For validating the map, four out of six participants agreed with the resulting crop-level maps,  
41 while one participant disagreed, and one participant only partly agreed (this farmer mentioned that  
42 he gave the grade 5/10 for the result).

43

| Order of calculation | Target upland crops to calculate in order | Calculated area** (ha) | Defined area (ha) | Difference with defined area** * (ha) |
|----------------------|-------------------------------------------|------------------------|-------------------|---------------------------------------|
| 1st                  | Upland rice first year                    | 31.64                  | 31.5              | -0.14                                 |
| 2nd                  | Upland rice second year                   | 31.40                  | 31.5              | +0.10                                 |
| 3rd                  | Maize/cassava first year                  | 31.84                  | 31.5              | -0.34                                 |
| 4th                  | Maize/cassava second year                 | 31.52                  | 31.5              | -0.02                                 |
| 5th                  | Fallow first year                         | 31.12                  | 31.5              | +0.38                                 |
| 6th                  | Fallow second year                        | 31.48                  | 31.5              | +0.02                                 |
| 7th                  | Fallow third year                         | 31.36                  | 31.5              | +0.14                                 |
| 8th                  | Fallow forth year                         | 31.60                  | 31.5              | -0.10                                 |
| 9th                  | Fallow fifth year                         | 31.48                  | 31.5              | +0.02                                 |
| 10th                 | Fallow sixth year                         | 32.28                  | 31.5              | -0.78                                 |

44 \* Defined area equal to a value derived from the total upland area divided into 10 (crops)

45 \*\* Calculated area, the values resulting from adjustment processes

\*\*\* Difference area <1 ha was accepted at the commune level (Statistic Department Yen Chau district, 2012)

**Figure S3.** A-Remote sensing data (aerial photograph 1954, Landsat 1993, 1999 and LISS III 2007).

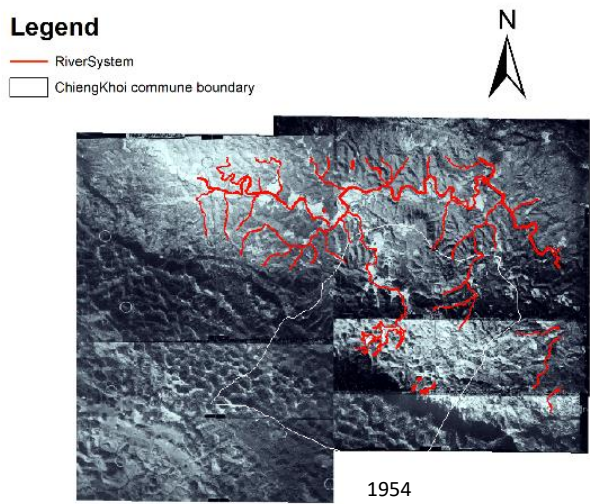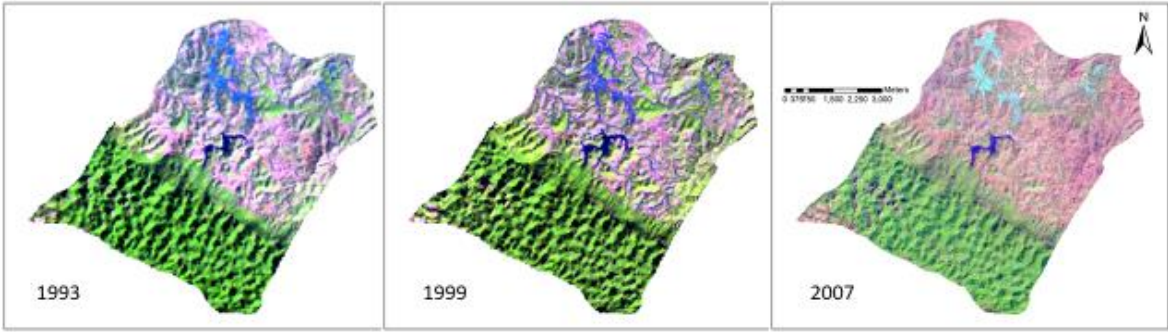

**Figure S4.** Land use map of 1954, 1993, 1999, and 2007 classified from remote sensing data in Appendix 5a using the supervised classification method.

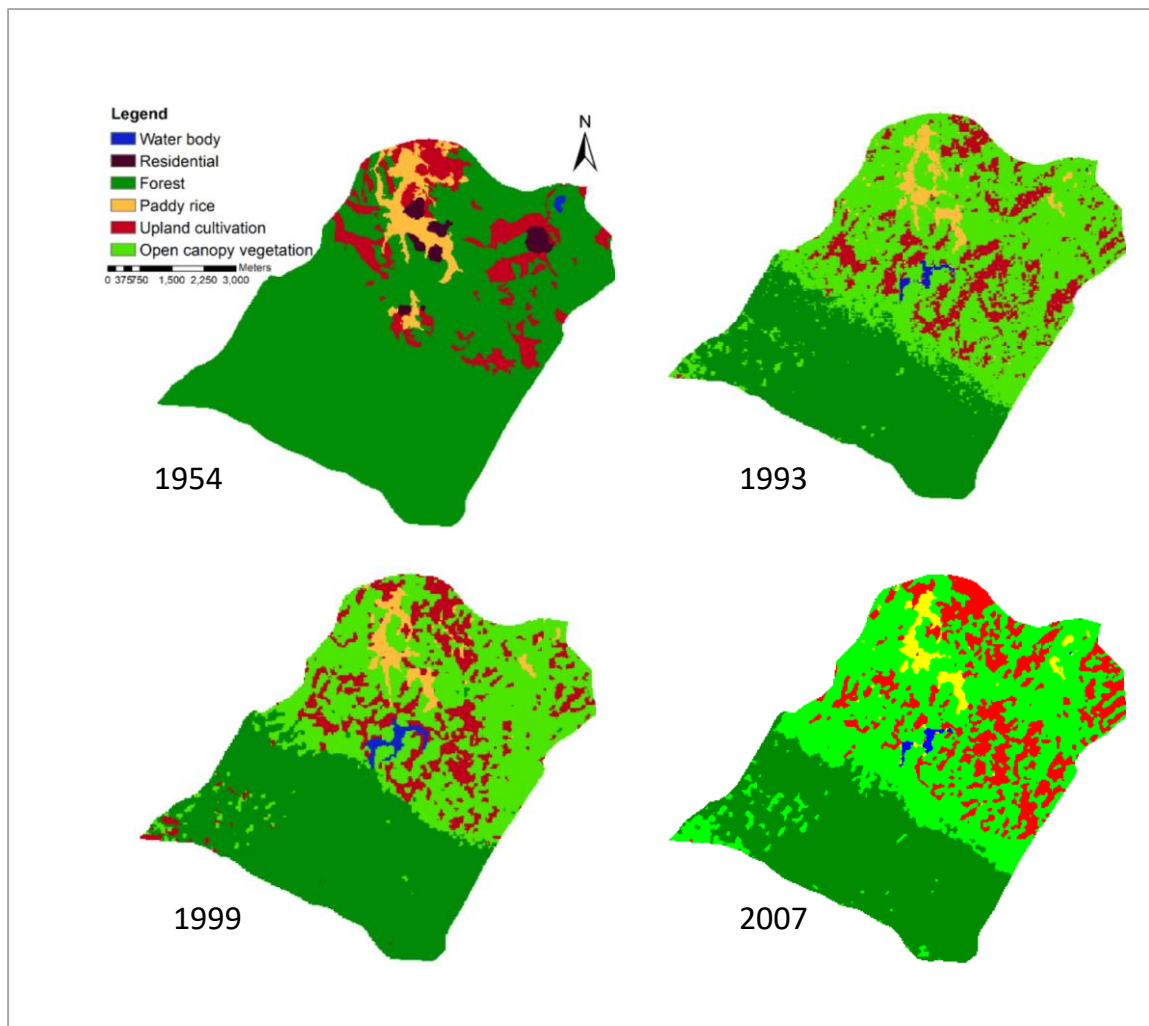

53

54
